# Supplementary material
Source: publisher site journal article supplement (https://www.dovepress.com/article/supplementary_file/531669/531669%20%252509Supplementary%20Table%201%20and%202.docx)
Supplement: Supplementary file 1 [file 531669%20%252509Supplementary%20Table%201%20and%202.docx]

Supplementary Table 1 Demographics and clinical characteristics between two groups after excluding patients with younger than 60 years and pathologic fractures.

|  |  | **Before matching** | | |  | **After matching** | | |
| --- | --- | --- | --- | --- | --- | --- | --- | --- |
| **Characteristics** |  | **CCR<7.1(n=807)** | **CCR≥7.1(n=807)** | **SMD** |  | **CCR<7.1(n=564)** | **CCR≥7.1(n=564)** | **SMD** |
| Age (years) |  | 79.76 (9.01) | 76.94 (8.97) | 0.313 |  | 78.70 (9.15) | 78.16 (8.83) | 0.060 |
| Gender |  |  |  | 0.573 |  |  |  | 0.024 |
| Female |  | 646 (80.0) | 437 (54.2) |  |  | 412 (73.0) | 418 (74.1) |  |
| Male |  | 161 (20.0) | 370 (45.8) |  |  | 152 (27.0) | 146 (25.9) |  |
| BMI (kg/m2) |  | 22.38 (3.83) | 22.44 (3.62) | 0.018 |  | 22.39 (3.72) | 22.37 (3.54) | 0.004 |
| ASA physical status |  |  |  | 0.225 |  |  |  | 0.011 |
| < III |  | 465 (57.6) | 552 (68.4) |  |  | 360 (63.8) | 363 (64.4) |  |
| ≥III |  | 342 (42.4) | 255 (31.6) |  |  | 204 (36.2) | 201 (35.6) |  |
| Alcohol history |  | 12 (1.5) | 20 (2.5) | 0.071 |  | 11 (2.0) | 11 (2.0) | <0.001 |
| Smoking history |  | 27 (3.3) | 48 (5.9) | 0.124 |  | 25 (4.4) | 19 (3.4) | 0.055 |
| Hypertension |  | 451 (55.9) | 405 (50.2) | 0.114 |  | 308 (54.6) | 299 (53.0) | 0.032 |
| Diabetes |  | 252 (31.2) | 182 (22.6) | 0.197 |  | 144 (25.5) | 152 (27.0) | 0.032 |
| Cardiovascular disease |  | 193 (23.9) | 154 (19.1) | 0.118 |  | 120 (21.3) | 115 (20.4) | 0.022 |
| Lung disease |  | 89 (11.0) | 45 (5.6) | 0.199 |  | 47 (8.3) | 41 (7.3) | 0.040 |
| Time to admission (hours) |  | 24.0 (7.8, 72.0) | 13.5 (6.0, 31.2) | 0.165 |  | 20.0 (6.0, 48.0) | 14.0 (6.0, 36.0) | 0.010 |
| Hemoglobin (g/L) |  | 112.41 (19.96) | 117.45 (20.31) | 0.250 |  | 114.32 (19.50) | 113.76 (19.22) | 0.029 |
| Albumin (g/L) |  | 35.47 (4.84) | 36.40 (4.31) | 0.203 |  | 36.02 (4.84) | 35.93 (4.40) | 0.019 |
| APTT (s) |  | 37.17 (6.52) | 36.14 (5.69) | 0.169 |  | 36.37 (6.72) | 36.14 (5.74) | 0.038 |
| Glucose (mmol/L) |  | 7.70 (3.04) | 7.55 (3.19) | 0.047 |  | 7.66 (3.10) | 7.70 (3.23) | 0.011 |
| D-dimer (mg/L) |  | 3.1 (1.7, 6.6) | 5.0 (2.0, 8.7) | 0.188 |  | 3.7 (1.8, 8.4) | 4.6 (2.0, 7.7) | 0.015 |
| Leucocyte count (109/L) |  | 8.53 (3.12) | 8.82 (2.86) | 0.097 |  | 8.74 (3.23) | 8.70 (2.89) | 0.013 |
| Neutrophil count (109/L) |  | 6.63 (2.89) | 6.99 (2.70) | 0.127 |  | 6.89 (3.07) | 6.89 (2.72) | 0.001 |

BMI, body mass index; ASA, American Society of Anesthesiologists; APTT, activated partial thromboplastin time; CCR, creatine-to-cystatin C ratio; SMD, standardized mean difference.

Supplementary Table 2 Propensity score matching analysis to assess the association between CCR and 1-year mortality in patients with hip fracture, excluding patients with younger than 60 years and pathologic fractures.

| **Analysis** | **Total** | **Events (%)** | **HR (95% CI)** | ***P*** |
| --- | --- | --- | --- | --- |
| Crude analysis |  |  |  |  |
| CCR<7.1 | 807 | 96 (11.9) | Reference |  |
| CCR≥7.1 | 807 | 46 (5.7) | 0.46 (0.33~0.66) | < 0.001 |
| Multivariable analysis |  |  |  |  |
| CCR<7.1 | 807 | 96 (11.9) | Reference |  |
| CCR≥7.1 | 807 | 46 (5.7) | 0.58 (0.40~0.85) | 0.005 |
| Propensity score matched |  |  |  |  |
| CCR<7.1 | 564 | 64 (11.3) | Reference |  |
| CCR≥7.1 | 564 | 35 (6.2) | 0.53 (0.35~0.80) | 0.003 |

CCR, creatine-to-cystatin C ratio; HR, hazard ratio; CI, conﬁdence interval.
